# Supplementary material
Source: PubMed Central journal article supplement (PMC7952005)
Supplement: NIHMS1672474-supplement-Supplemental_Data_File__doc__pdf__etc__.pdf [file NIHMS1672474-supplement-Supplemental_Data_File__doc__pdf__etc__.pdf]

# A Study on the Effect of Patient Characteristics, Geographical Utilization, and Patient Outcomes for Total Pancreatectomy Alone and Total Pancreatectomy With Islet Autotransplantation in Patients With Pancreatitis in the United States

## SUPPLEMENTAL DIGITAL CONTENT

**SUPPLEMENTAL TABLE 1.** List of ICD9CM Codes Used for the Study, and Hierarchy\* for Patient Selection

| Diagnosis/Procedure       | ICD-9-CM Codes                                                                                                                                                                                                                                                                          | Variable Location |
|---------------------------|-----------------------------------------------------------------------------------------------------------------------------------------------------------------------------------------------------------------------------------------------------------------------------------------|-------------------|
| Total pancreatectomy      | 52.6                                                                                                                                                                                                                                                                                    | PR1-PR15          |
| ↓                         |                                                                                                                                                                                                                                                                                         |                   |
| Islet autotransplantation | 52.84                                                                                                                                                                                                                                                                                   | PR1-PR15          |
| ↓                         |                                                                                                                                                                                                                                                                                         |                   |
| Chronic pancreatitis      | 577.1                                                                                                                                                                                                                                                                                   | DX1-DX25          |
| ↓                         |                                                                                                                                                                                                                                                                                         |                   |
| Acute pancreatitis        | 577.0                                                                                                                                                                                                                                                                                   | DX1-DX25          |
| Pancreatic neoplasm       | 156.2, 157, 157.0, 157.1, 157.2, 157.3, 157.8, 157.9                                                                                                                                                                                                                                    | DX1-DX25          |
| Pregnancy status          | 7923, 7965, V617, V6511, any diagnosis code starting with 63, 64, 65, 66, 670, 671, 672, 673, 674, 675, 676, 677, V22, V24, V27, V280, 282, V286, V616, V617, 753, 7530, 7531, 7532, 7533, 7534, 7535, 7536, 7537, any procedure code starting with 72, 73, 74, 750, 751, 752, 754, 755 | DX2-DX25          |

\*See arrows.

**SUPPLEMENTAL TABLE 2.** Trend of Total Pancreatectomy Among all Patients With Chronic Pancreatitis During the Study Period

|           |     | 2002    | 2003    | 2004    | 2005    | 2006    | 2007    |
|-----------|-----|---------|---------|---------|---------|---------|---------|
| TP        | No  | 86,326  | 89,894  | 95,900  | 94,987  | 105,231 | 109,303 |
|           | Yes | 97      | 23      | 53      | 43      | 136     | 52      |
| % with TP |     | 0.11    | 0.03    | 0.05    | 0.05    | 0.13    | 0.05    |
|           |     | 2008    | 2009    | 2010    | 2011    | 2012    | 2013    |
| TP        | No  | 131,038 | 140,281 | 152,355 | 154,992 | 149,845 | 150,160 |
|           | Yes | 310     | 166     | 272     | 219     | 220     | 240     |
| % with TP |     | 0.24    | 0.12    | 0.18    | 0.14    | 0.15    | 0.16    |

Cochran-Armitage test indicates a significant trend,  $P < 0.001$ .

TP indicates total pancreatectomy.

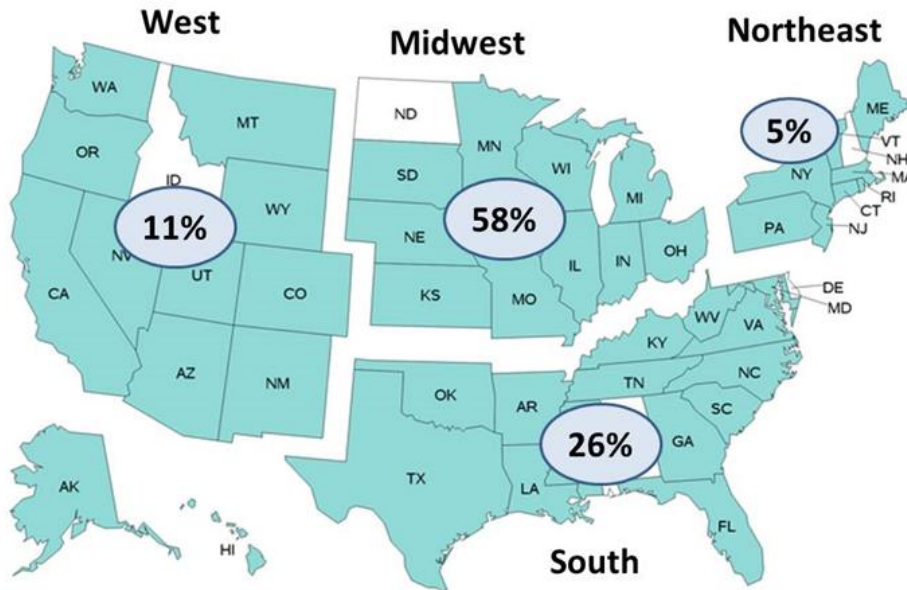

**SUPPLEMENTAL FIGURE 1.** The map illustrates the distribution of TP and TPIAT in the United States according to census derived geographical zones. White shaded areas did not provide data. State information could have varied by year

| <b>SUPPLEMENTAL TABLE 3.</b> Adjusted Length of Stay and Cost for Patients With any Type of Pancreatitis Who Had TP Alone Compared to TPIAT |                                          |          |
|---------------------------------------------------------------------------------------------------------------------------------------------|------------------------------------------|----------|
|                                                                                                                                             | <b>Adjusted Coefficient<br/>(95% CI)</b> | <b>P</b> |
| Length of stay, TP 24 d; TPIAT 15 d                                                                                                         | 9.06 (4.51–13.60)                        | <0.001   |
| Costs, \$US dollars                                                                                                                         | 19,050 (2408–35,691)                     | 0.025    |

TPIAT was cost reference.  
CI indicates confidence interval; TP, total pancreatectomy; TPIAT, total pancreatectomy and islet autotransplantation.

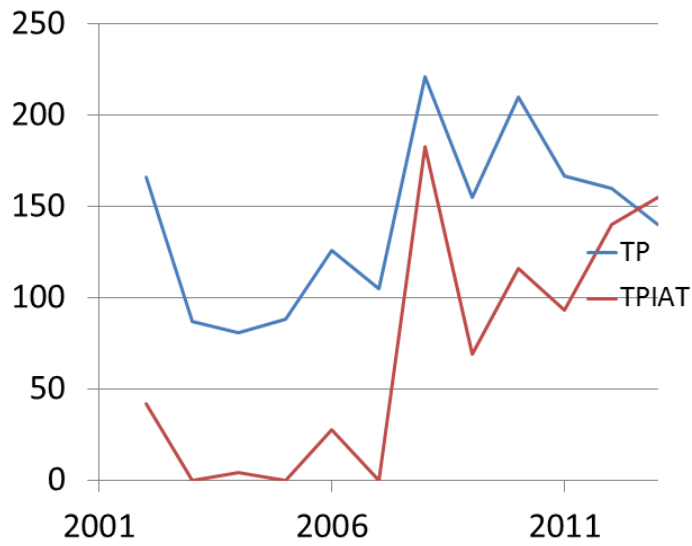

**SUPPLEMENTAL FIGURE 2.** Graph showing the trend of TP and TPIAT over the study period. There is a significant trend using Cochran-Armitage tests  $P < 0.001$ .
